# Supplementary material for: Establishment of EMab-134, a Sensitive and Specific Anti-Epidermal Growth Factor Receptor Monoclonal Antibody for Detecting Squamous Cell Carcinoma Cells of the Oral Cavity
Source: PubMed Central journal article supplement (PMC6975130; doi:10.1089/mab.2017.0042), 2017-12-01
Supplement: Suppl_Fig3.pdf [file Suppl_Fig3.pdf]

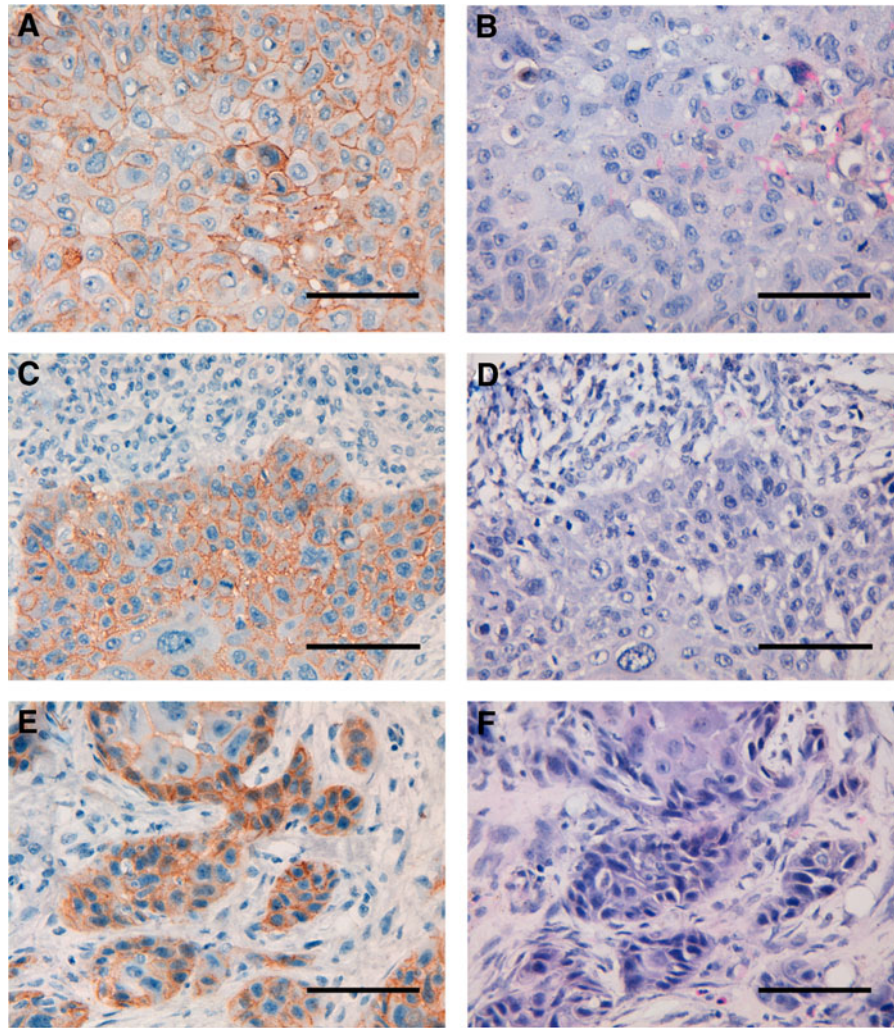

**SUPPLEMENTARY FIG. S3.** Immunohistochemical analysis by EMap-134 for oral cancers. (A, C, E) After antigen retrieval using EnVision FLEX Target Retrieval Solution High pH, sections were incubated with 5  $\mu\text{g}/\text{mL}$  of primary EMap-134 for 1 hour at room temperature followed by treatment with Envision+ kit for 30 minutes. Color was developed using 3,3-diaminobenzidine tetrahydrochloride for 2 minutes, and sections were then counterstained with hematoxylin. (B, D, F) Hematoxylin and eosin staining; scale bar = 100  $\mu\text{m}$ . (A, B) Case 3, (C, D) Case 9, (E, F) Case 26.
